# Supplementary material for: BMP2/BMPR1A is linked to tumour progression in dedifferentiated liposarcomas
Source: PeerJ. 2016 Apr 19;4:e1957. doi: 10.7717/peerj.1957 (PMC4841227; doi:10.7717/peerj.1957)
Supplement: Table S1 [file peerj-04-1957-s008.xlsx]

## Sheet: Sheet1
		gene_id	gene number	enrichment in BMPR1A-biased relative to BMPR1B	Adjusted P Value
		BMPR1B	658	0.376411	0.000377371		O'Neill et al., Supplementary Table 2
		ATP5H	10476	0.695058	0.00088244		BMPR1A-biased signalling normalised gene expression
		PPP1R14B	26472	0.46273	0.00107396		Enrichment vs BMPR1B-biased signalling
		EIF3M	10480	0.747501	0.00123806		multiple t tests with bonferroni post hoc
		MRPL23	6150	0.628119	0.0015122		Whole sarcoma dataset
		SLC25A19	60386	0.720322	0.00158035		n= 30vs30
		MRPS5	64969	0.73006	0.00162267
		PSMA1	5682	0.732447	0.00166272
		BNIP1	662	0.733097	0.0017949
		DDTL	100037417	0.648304	0.00189726
		ICT1	3396	0.744522	0.00192902
		AIMP2	7965	0.655387	0.00218827
		TOMM40	10452	0.694824	0.00235463
		COX5A	9377	0.675563	0.00239773
		PDCD2	5134	0.780814	0.00244925
		TAF10	6881	0.610732	0.00246142
		TPI1	7167	0.669826	0.00250217
		COPS6	10980	0.774067	0.00251151
		ENO1	2023	0.568379	0.00265784
		EPC1	80314	1.35287	0.00274972
		MRPL17	63875	0.697904	0.0027652
		MRTO4	51154	0.681636	0.00278963
		DDT	1652	0.637131	0.00294389
		UBL4A	8266	0.790527	0.0029973
		ZNF737	100129842	1.57401	0.00305921
		PPP1CA	5499	0.654311	0.00316204
		POLR2L	5441	0.62285	0.00320683
		DRAP1	10589	0.541496	0.0033756
		UBE2M	9040	0.731577	0.00341152
		COMMD9	29099	0.693077	0.00349938
		RGS19	10287	0.696307	0.00353987
		PARK7	11315	0.786331	0.00356235
		PTGES2	80142	0.679234	0.00358172
		TALDO1	6888	0.706645	0.00358483
		PKM2	5315	0.585493	0.00378589
		CENPC1	1060	1.24433	0.00379921
		ZRANB1	54764	1.24768	0.0039787
		GPI	2821	0.695245	0.00398142
		KIAA1257	57501	3.09674	0.00399002
		TPRKB	51002	0.792805	0.00404597
		DCHS1	8642	1.53224	0.00408622
		NIT2	56954	0.715864	0.00426572
		GAPDH	2597	0.6243	0.00427067
		DNAJC7	7266	0.787213	0.00446566
		POMP	51371	0.731279	0.00446681
		MRPS23	51649	0.778772	0.00446733
		AMPD3	272	0.418588	0.00451164
		RPLP2	6181	0.611431	0.00456271
		LRFN4	78999	0.651064	0.00457634
		SH3BGRL3	83442	0.427957	0.00461799
		C11orf74	119710	0.75424	0.00466537
		NOP16	51491	0.671893	0.00469638
		EXOSC5	56915	0.640555	0.00470333
		MRPS34	65993	0.746139	0.00477187
		VDAC1	7416	0.712413	0.00482684
		TAF9	6880	0.80872	0.00484717
		MACROD1	28992	0.560596	0.00488392
		TUBA1C	84790	0.597495	0.00516417
		COX5B	1329	0.680817	0.00528819
		MRPL21	219927	0.720274	0.00531669
		BOLA3	388962	0.70291	0.00537236
		NDUFA6	4700	0.75592	0.00549704
		LOC134466	134466	2.36518	0.0057283
		TRMT112	51504	0.720764	0.00574188
		MTIF2	4528	0.810467	0.00577679
		AGAP5	729092	1.33147	0.00589751
		RPA3	6119	0.642109	0.00594056
		ATP5J2	9551	0.677565	0.00612333
		PLSCR4	57088	1.73451	0.00612433
		MPV17	4358	0.74453	0.00613238
		FADD	8772	0.705527	0.00629773
		SIRT1	23411	1.29613	0.00634592
		GEMIN6	79833	0.716275	0.00640527
		PSMB7	5695	0.720442	0.00657081
		UCHL3	7347	0.726612	0.00660576
		LDHA	3939	0.627009	0.00671205
		PLEKHA1	59338	1.26459	0.00679331
		CD44	960	0.569793	0.00681507
		ETFB	2109	0.710439	0.00685683
		APITD1	378708	0.768983	0.00689739
		PPPDE2	27351	0.741062	0.00696746
		CCNI	10983	1.27733	0.0069929
		UBE2MP1	606551	0.783043	0.00712611
		PA2G4P4	647033	0.815148	0.00718896
		MGC72080	389538	0.595025	0.00719476
		NME2	4831	0.652364	0.0072703
		RPL10	6134	0.737177	0.00727259
		ZC3H12B	340554	1.78302	0.00732342
		NDUFV2	4729	0.768513	0.00738795
		PDAP1	11333	0.799644	0.00744519
		TIMM16	51025	0.712244	0.00752677
		MRPL12	6182	0.641517	0.00756816
		S100A16	140576	0.498279	0.00761528
		BAK1	578	0.766921	0.00764575
		DCP1A	55802	1.24875	0.00770617
		MPP1	4354	0.715529	0.00774875
		HRAS	3265	0.614124	0.00776611
		PSMB1	5689	0.760973	0.00780254
		TSC22D1	8848	1.39491	0.0078365
		GTF3A	2971	0.73798	0.00786482
		CCDC86	79080	0.606624	0.0079014
		CHMP2A	27243	0.707495	0.00799503
		GPR172A	79581	0.691947	0.00808508
		NHP2	55651	0.768181	0.0081989
		NDUFAF2	91942	0.704849	0.00823085
		SPATA18	132671	2.58731	0.00825991
		ZNF626	199777	1.42644	0.00840324
		EIF6	3692	0.757381	0.00849298
		CFL1	1072	0.673738	0.00852003
		MRPS24	64951	0.75904	0.00855251
		SSSCA1	10534	0.720959	0.00858542
		PARP12	64761	0.704174	0.00869857
		UNC93B1	81622	0.66724	0.00871974
		ZNF429	353088	1.53954	0.00873452
		PSMA5	5686	0.756032	0.00877992
		NFU1	27247	0.786818	0.00891551
		FIBP	9158	0.71488	0.00893508
		LOC650623	650623	1.70704	0.0089493
		SIRT7	51547	0.740708	0.00899766
		DKC1	1736	0.781454	0.00906927
		CHCHD8	51287	0.736113	0.00910231
		TACO1	51204	0.795402	0.00913712
		BCAR3	8412	0.565085	0.00916206
		PSME2	5721	0.639652	0.00919481
		PRDX5	25824	0.702118	0.00919979
		RBKS	64080	0.613666	0.00923654
		HDDC3	374659	0.795427	0.00933607
		TRPT1	83707	0.73794	0.00933609
		EIF3D	8664	0.75852	0.00936528
		ARPC3	10094	0.742823	0.00941076
		IGLL1	3543	0.185901	0.00943871
		ZNF91	7644	1.38421	0.0095293
		RALGAPA1	253959	1.34536	0.00953939
		SNRPG	6637	0.756817	0.00959005
		CMC1	152100	0.778157	0.0096562
		HGS	9146	0.780518	0.00969872
		C11orf59	55004	0.767572	0.00997197
		BMPR1A	657	1.32579	0.00997572
		TMEM120A	83862	0.676916	0.0100094
		MIF	4282	0.677732	0.0100554
		CAPN7	23473	1.26401	0.0101019
		WDR54	84058	0.673367	0.0101178
		PTDSS2	81490	0.705819	0.0101343
		EEF1E1	9521	0.726348	0.0102529
		CTSD	1509	0.623543	0.0102888
		ARRDC3	57561	1.46894	0.0103825
		CCDC58	131076	0.797583	0.0104123
		HMBS	3145	0.707882	0.0104244
		ATOX1	475	0.705698	0.010492
		S100A3	6274	0.346907	0.0105365
		ANAPC11	51529	0.71296	0.0105402
		ATP5G1	516	0.724836	0.0105495
		NME2P1	283458	0.65238	0.0106185
		DUS1L	64118	0.758898	0.0107799
		ZBTB8A	653121	1.21959	0.0107896
		PRR13	54458	0.762737	0.0108571
		G6PD	2539	0.667969	0.0108711
		KLHL15	80311	1.46299	0.0108777
		PSMD12	5718	0.815067	0.0109733
		SSBP1	6742	0.774347	0.0110297
		PSMC2	5701	0.820492	0.0110832
		PSMD13	5719	0.756415	0.011282
		IDH3G	3421	0.747679	0.0113127
		SPON1	10418	2.96161	0.0113246
		PPIAL4C	653598	0.755771	0.011346
		BMPR2	659	1.32085	0.0113847
		SDHB	6390	0.750324	0.0114128
		C21orf121	150142	0.178352	0.0115325
		NME1	4830	0.616441	0.011714
		CCDC137	339230	0.775465	0.0117269
		SETBP1	26040	1.5254	0.0117319
		IFI30	10437	0.470371	0.0117341
		ATAD3A	55210	0.736492	0.0117716
		NDUFV1	4723	0.74752	0.011811
		S100A6	6277	0.503517	0.0118859
		EFHD2	79180	0.697529	0.0119092
		FAM173A	65990	0.69571	0.0119217
		ZNF711	7552	1.84652	0.0119746
		CLPB	81570	0.690669	0.0119956
		SPRY1	10252	2.63086	0.0120257
		POLR2F	5435	0.743499	0.0120422
		DYNC1LI2	1783	1.22184	0.0120901
		PRELID1	27166	0.749366	0.0121302
		PTPMT1	114971	0.772212	0.0122181
		MRPS12	6183	0.725361	0.0122341
		PKD2	5311	1.32049	0.0122503
		LSM12	124801	0.801043	0.012266
		SHFM1	7979	0.711162	0.0123356
		CDK7	1022	0.780825	0.0124278
		ZNF486	90649	1.36123	0.0124381
		FAU	2197	0.720763	0.0124962
		CLASP1	23332	1.23192	0.0125245
		CD68	968	0.553869	0.0126854
		C1GALT1	56913	0.635014	0.0127974
		RUVBL2	10856	0.768831	0.0128155
		NUDT8	254552	0.594852	0.0128997
		C1orf151	440574	0.722114	0.0129025
		PPIA	5478	0.773359	0.0129083
		STRA13	201254	0.719916	0.0129357
		RPL36A	6173	0.669871	0.0129358
		AIM2	9447	0.123512	0.0130338
		FAM13C	220965	1.86598	0.0131646
		FIS1	51024	0.76084	0.0131826
		PLAC9	219348	3.90103	0.0132179
		FPR3	2359	0.605831	0.013263
		ARID4A	5926	1.29461	0.0133452
		TXN	7295	0.622138	0.0133726
		RPL27A	6157	0.674746	0.0134094
		ANXA2P3	305	0.521372	0.0135635
		ZNF253	56242	1.36863	0.0135734
		WNT7B	7477	0.17131	0.013584
		SIK3	23387	1.20151	0.0135972
		PA2G4	5036	0.814573	0.013736
		SNRPA	6626	0.781885	0.0137903
		SMYD3	64754	0.585928	0.0138258
		ADSL	158	0.803283	0.0139221
		IRAK1	3654	0.731368	0.0139866
		MRPL40	64976	0.74725	0.0140066
		PTPRS	5802	1.47736	0.0140533
		HK2	3099	0.358176	0.0144375
		MTUS1	57509	1.57569	0.014569
		STYXL1	51657	0.757376	0.0146425
		NUDT22	84304	0.731234	0.0146644
		C1orf31	388753	0.729106	0.0146659
		C16orf72	29035	1.17614	0.0147986
		FERMT3	83706	0.593881	0.0148313
		MRPL11	65003	0.772302	0.0148596
		FRMD3	257019	1.62951	0.0148984
		PSMD4	5710	0.778203	0.0149597
		PHF5A	84844	0.809208	0.0150298
		PFDN6	10471	0.698338	0.0151616
		BRMS1	25855	0.58749	0.0152413
		EIF3I	8668	0.80651	0.0153309
		LOC100144603	100144603	0.641651	0.0153623
		LACTB2	51110	0.708267	0.0153635
		PRKAG1	5571	0.845715	0.0153698
		PIK3CD	5293	0.449586	0.015377
		NSDHL	50814	0.780139	0.0153991
		CTTN	2017	0.742052	0.0154199
		PSMD14	10213	0.830549	0.0155709
		NUDC	10726	0.777148	0.0155761
		DAGLB	221955	0.729662	0.0156841
		KIAA1328	57536	1.24191	0.0157295
		PCYT2	5833	0.716477	0.0158797
		RNASEL	6041	1.3367	0.0159031
		FBLN5	10516	2.28263	0.0159101
		ZNF510	22869	1.28854	0.0159271
		MRPL22	29093	0.804632	0.0161239
		PES1	23481	0.762418	0.0161346
		HSPE1	3336	0.742015	0.0161401
		RPL14	9045	0.704093	0.0161633
		COX8A	1351	0.714059	0.0162085
		LOC442454	442454	0.746848	0.0162914
		TGFB1	7040	0.6777	0.0163272
		ZFYVE20	64145	1.26307	0.0163724
		CARS	833	0.741479	0.0164035
		OR1L8	138881	2.3176	0.0164446
		PET112L	5188	0.756478	0.0164882
		C16orf13	84326	0.727873	0.0165354
		GAB1	2549	1.36277	0.0165384
		C21orf62	56245	1.93313	0.0166071
		ATP5G2	517	0.766613	0.0166571
		FMNL1	752	0.561146	0.0167014
		DNAJC15	29103	0.691043	0.016719
		SLC35E4	339665	0.549175	0.0168194
		CATSPER1	117144	0.476777	0.0168526
		C17orf79	55352	0.768643	0.0168537
		FRS2	10818	2.96	0.016924
		EIF5A	1984	0.707718	0.0169511
		BCAP31	10134	0.735988	0.0169717
		PDDC1	347862	0.783135	0.0169963
		UTP14A	10813	0.780689	0.017097
		SVEP1	79987	2.33054	0.0171178
		SNRPD2	6633	0.745194	0.0171817
		TCEB1	6921	0.81587	0.0172638
		SLC2A5	6518	0.373392	0.0173488
		TBRG4	9238	0.830712	0.0174105
		FAM50A	9130	0.642173	0.017433
		PDGFD	80310	2.25732	0.0174472
		FAM26F	441168	0.546908	0.0174952
		TMEM138	51524	0.748107	0.0175197
		ARHGAP22	58504	0.429892	0.0175662
		SCYL3	57147	1.40305	0.0175844
		LPXN	9404	0.502148	0.0176927
		UQCRB	7381	0.76581	0.0177042
		SPARCL1	8404	2.21782	0.0177745
		COX7B	1349	0.738837	0.0177923
		PUSL1	126789	0.719773	0.0178577
		MECR	51102	0.817355	0.0178719
		MDM2	4193	3.27084	0.0179626
		TBCA	6902	0.820303	0.0180092
		EFTUD2	9343	0.815478	0.0180266
		ZNF501	115560	1.27538	0.0180826
		EMP3	2014	0.581499	0.0181015
		ZNF708	7562	1.38338	0.0181409
		POPDC3	64208	0.319475	0.0181451
		ABHD12	26090	0.662399	0.0181781
		PSMD2	5708	0.759001	0.0182311
		SART1	9092	0.743854	0.0184371
		ANXA2	302	0.558832	0.0185291
		PLIN3	10226	0.723557	0.0186501
		LRP5	4041	1.56282	0.0187132
		NUP37	79023	0.768142	0.0187371
		UQCR10	29796	0.739828	0.0188145
		ALDOA	226	0.69978	0.0188403
		SLC25A10	1468	0.59447	0.0188471
		EIF4EBP1	1978	0.58686	0.0188605
		VEGFB	7423	0.731854	0.0189947
		EFHA2	286097	1.38038	0.019043
		PPP1R7	5510	0.708933	0.0190532
		RHOG	391	0.688583	0.019089
		LAMA2	3908	2.20139	0.0191035
		C9orf89	84270	0.661077	0.019112
		C3orf55	152078	0.33356	0.0191446
		STOML2	30968	0.772803	0.0191905
		ANXA2P2	304	0.592435	0.0193637
		ADM	133	0.560414	0.0194148
		LOC388955	388955	0.776633	0.0195465
		TAZ	6901	0.78041	0.0195769
		RCC1	1104	0.708346	0.0197254
		FAM136A	84908	0.804382	0.0197946
		C8orf59	401466	0.781195	0.0199517
		MRPS15	64960	0.75009	0.0199658
		ARFIP2	23647	0.809175	0.0199851
		ALG8	79053	0.752027	0.0200205
		ZFP90	146198	1.28372	0.0200747
		TRMU	55687	0.747345	0.020143
		PC	5091	0.603318	0.0202623
		ANXA2P1	303	0.585162	0.0202915
		EDA2R	60401	1.76527	0.0203063
		LOC728392	728392	1.84522	0.0203069
		SLC25A1	6576	0.768836	0.0203317
		ALKBH3	221120	0.79751	0.0205224
		GAP43	2596	2.91034	0.0205335
		ORMDL2	29095	0.741838	0.0205366
		C20orf141	128653	0.295621	0.0205545
		C6orf125	84300	0.738993	0.0205771
		ENDOG	2021	0.662215	0.020583
		AIM1	202	0.53263	0.0205862
		GPX1	2876	0.668292	0.0206275
		HIGD2A	192286	0.765073	0.0206785
		UQCRQ	27089	0.735973	0.0207323
		ARPC1A	10552	0.776343	0.0207507
		L3MBTL3	84456	1.58877	0.0208233
		LTBP3	4054	1.4537	0.0209146
		CLIC1	1192	0.755829	0.0209253
		NDUFA8	4702	0.743088	0.0209509
		MGC70857	414919	0.739072	0.0210566
		SLC12A4	6560	1.25664	0.0211407
		COASY	80347	0.841172	0.0212728
		NDUFS8	4728	0.642782	0.0214021
		CAPNS1	826	0.770645	0.0214073
		CETN2	1069	0.817564	0.0214871
		BANF1	8815	0.747677	0.0215232
		HES6	55502	0.532521	0.021528
		QPCTL	54814	0.664377	0.0217183
		NDUFA1	4694	0.753204	0.0217563
		DEDD2	162989	0.721704	0.0217802
		ARF3	377	0.862577	0.0218105
		GTF2F2	2963	0.815743	0.0218164
		PTTG2	10744	0.704575	0.0218536
		CSTB	1476	0.705844	0.0219289
		KMO	8564	0.521129	0.0220527
		C9orf116	138162	0.678104	0.0221318
		HINT1	3094	0.8158	0.0221857
		ZNF578	147660	1.49924	0.0222994
		ARHGEF1	9138	0.811475	0.0223101
		C5orf39	389289	1.54896	0.0223163
		PDZD8	118987	1.37596	0.0223728
		SLC38A5	92745	0.256886	0.0224429
		INPP5A	3632	1.30609	0.0224543
		DNAJC4	3338	0.734744	0.0224605
		TNFRSF12A	51330	0.49436	0.0224814
		GNPNAT1	64841	0.729667	0.0225019
		ATP5C1	509	0.816399	0.0226164
		THAP9	79725	1.2124	0.0226393
		PHB	5245	0.800093	0.0226584
		EIF2AK3	9451	1.4349	0.0226719
		ORAOV1	220064	0.712535	0.0227612
		EIF3K	27335	0.748348	0.0227705
		CLCA3P	9629	0.0792648	0.022796
		ASPA	443	4.08707	0.0228296
		NDUFA12	55967	0.783583	0.0228949
		PORCN	64840	0.746803	0.0230116
		ACOT13	55856	0.820008	0.0230219
		IMP4	92856	0.777697	0.0231357
		EIF5AL1	143244	0.745109	0.0231629
		NAA38	51691	0.816199	0.023189
		NOP10	55505	0.771478	0.0232977
		GIP	2695	0.121885	0.0233067
		RAG1AP1	55974	0.813209	0.0233079
		BRI3	25798	0.686758	0.0233122
		COX7C	1350	0.792398	0.0233443
		ADD1	118	1.21828	0.0234076
		SLC25A5	292	0.783675	0.0234813
		RANGAP1	5905	0.720633	0.0234845
		SPI1	6688	0.573834	0.0235526
		SCARA3	51435	1.63247	0.023565
		ATP5G3	518	0.774375	0.0236403
		YWHAE	7531	0.780054	0.0236437
		ZNF713	349075	1.4287	0.0236821
		CCDC85B	11007	0.530755	0.0237422
		ZMAT5	55954	0.750439	0.0237587
		CCDC48	79825	4.99716	0.0238285
		MEX3C	51320	1.20219	0.0238487
		NOL7	51406	0.839741	0.0239648
		ABHD11	83451	0.68319	0.0240853
		ZNF268	10795	1.35726	0.0241228
		AURKAIP1	54998	0.756896	0.0241417
		IGF1	3479	3.17127	0.0241698
		FAH	2184	0.64824	0.0241789
		SLC22A18	5002	0.594	0.0241982
		HMGB3L1	128872	0.447788	0.0242371
		KLHL28	54813	1.33519	0.0243351
		EMG1	10436	0.75745	0.0243419
		ZFP37	7539	1.33236	0.0243533
		RPL26L1	51121	0.824473	0.0243587
		CCNG2	901	1.29949	0.02437
		APIP	51074	0.831143	0.0243809
		TOLLIP	54472	0.799651	0.024393
		NT5C2	22978	1.35255	0.024422
		ROR1	4919	1.43446	0.0245906
		VMA21	203547	0.740661	0.0246156
		MYST4	23522	1.41951	0.0246336
		BAALC	79870	0.506254	0.0247356
		UBE2F	140739	0.70779	0.0247877
		ARID1B	57492	1.20283	0.0248131
		ISG15	9636	0.562066	0.0248465
		FAM86C	55199	0.764535	0.0248797
		NFIX	4784	1.53761	0.0249081
		CYTH4	27128	0.581894	0.0249096
		RAB33B	83452	1.29224	0.0249394
		FAM3A	60343	0.798174	0.0249674
		GSTK1	373156	0.744852	0.0249695
		VEPH1	79674	0.156622	0.025011
		PSMC5	5705	0.818873	0.0250272
		HSD3B7	80270	0.42541	0.0250616
		LAT2	7462	0.629292	0.0250834
		SURF2	6835	0.678229	0.0250924
		TPMT	7172	0.735867	0.0251726
		MGC12982	84793	1.57768	0.0252199
		UBE2L6	9246	0.759183	0.0253583
		FKBP2	2286	0.647671	0.0254358
		WDFY2	115825	0.792347	0.0254551
		TFB1M	51106	0.814023	0.0256001
		FOSL1	8061	0.108839	0.0256114
		CD82	3732	0.384589	0.0257068
		NHP2L1	4809	0.835956	0.0257826
		BOLA2	552900	0.741662	0.0258542
		ZNF674	641339	1.24914	0.0258729
		ACAA1	30	0.742213	0.0258751
		LOC728758	728758	0.742006	0.0258936
		MLX	6945	0.869039	0.0258985
		TRAPPC4	51399	0.801505	0.0259056
		GAR1	54433	0.810444	0.0259142
		RRAS2	22800	0.473382	0.0259494
		YAP1	10413	1.33808	0.0259641
		PTPN7	5778	0.600473	0.0259925
		SLC25A39	51629	0.765773	0.0259996
		ZDHHC24	254359	0.696805	0.0260947
		INO80D	54891	1.2762	0.0261264
		PLAUR	5329	0.474538	0.026144
		SPATA24	202051	0.69655	0.0262215
		HDX	139324	1.29895	0.0262288
		DYX1C1	161582	0.693264	0.0262487
		RPL27	6155	0.758864	0.0264852
		FAM160B1	57700	1.24527	0.0268067
		HPRT1	3251	0.753806	0.026913
		PPIF	10105	0.744422	0.0269591
		ASCC1	51008	1.16829	0.0271789
		ANKRD17	26057	1.20781	0.02734
		RGS10	6001	0.732661	0.0273403
		GLT25D2	23127	2.6522	0.0273525
		C15orf63	25764	0.79342	0.0273991
		LAMC3	10319	2.69362	0.0274161
		DOK3	79930	0.687059	0.0274268
		MCTS1	28985	0.846354	0.0274854
		ADRM1	11047	0.802096	0.0275165
		IFRD2	7866	0.746894	0.0275469
		YTHDC1	91746	1.15482	0.0275537
		ZBED3	84327	1.62226	0.0275743
		CREBBP	1387	1.25546	0.0276041
		GPN2	54707	0.816942	0.0276168
		FTSJ1	24140	0.819815	0.027735
		FBXO21	23014	1.22325	0.027745
		LRIG2	9860	1.26362	0.0278425
		GEMIN7	79760	0.779612	0.0278978
		EDA	1896	2.416	0.0279788
		TMEM223	79064	0.73241	0.0280041
		C2orf67	151050	1.31166	0.0282216
		NAV3	89795	3.81907	0.0282612
		RBX1	9978	0.787325	0.0282622
		GFPT2	9945	0.492542	0.0283255
		LRRC45	201255	0.758825	0.0284273
		TYROBP	7305	0.569172	0.0284943
		UROS	7390	0.768409	0.0284955
		ESRRA	2101	0.731096	0.0284965
		FAM195A	84331	0.530357	0.0286183
		DHRS2	10202	2.41919	0.0286278
		PSMC3	5702	0.765445	0.0286357
		OLA1	29789	0.837917	0.0286699
		WBSCR22	114049	0.77889	0.028716
		POLR3K	51728	0.811581	0.0288422
		SH3RF3	344558	1.60446	0.0288772
		PSMB3	5691	0.736695	0.0288803
		STIP1	10963	0.740937	0.0288997
		ABCE1	6059	0.844957	0.0289131
		TMEM42	131616	0.803505	0.0289276
		OAS2	4939	0.643554	0.0289706
		MTP18	51537	0.497438	0.0289773
		TMEM141	85014	0.719738	0.0289809
		PRDX1	5052	0.783117	0.0291672
		LOC643387	643387	0.849641	0.0292951
		VEGFC	7424	0.580316	0.0293094
		SSNA1	8636	0.743057	0.029381
		PDE8B	8622	2.4502	0.0294421
		RNH1	6050	0.755903	0.0294925
		IRF7	3665	0.733186	0.0295008
		ELP2P	100131454	1.40963	0.0295682
		SCARB2	950	1.21214	0.029601
		SHKBP1	92799	0.733961	0.0298117
		PIN4	5303	0.759144	0.0298954
		RPP40	10799	0.684392	0.0300442
		CDC42BPA	8476	1.27977	0.0301155
		TIMM50	92609	0.732647	0.0301726
		ZNF720	124411	1.20746	0.0301783
		PNP	4860	0.709986	0.0301909
		DNTTIP1	116092	0.830916	0.0303477
		TRIP4	9325	0.832816	0.0303626
		BUD31	8896	0.735356	0.0304333
		PRICKLE4	29964	1.66984	0.0305212
		OR10H2	26538	11.8523	0.0306015
		AP2S1	1175	0.738811	0.0306213
		MRPL27	51264	0.777369	0.0306537
		TSSC4	10078	0.774663	0.0306592
		HSPC159	29094	1.48009	0.0306759
		LRP6	4040	1.46689	0.0308296
		RRP7A	27341	0.692794	0.0309353
		ZNF675	171392	1.31155	0.0310444
		DAAM2	23500	2.3686	0.031064
		HSCB	150274	0.713693	0.0313239
		COX6A1	1337	0.739373	0.0313454
		CSTF2T	23283	1.23786	0.0314232
		FGF16	8823	0.172488	0.031484
		PTPN6	5777	0.640656	0.03149
		UXT	8409	0.770278	0.0315034
		PXDN	7837	1.41951	0.0315601
		LAS1L	81887	0.846987	0.0316641
		RNF181	51255	0.715286	0.0316824
		HAGHL	84264	0.522705	0.0317233
		CD300LF	146722	0.585503	0.0317454
		RNF114	55905	0.821645	0.0317623
		C3orf43	255798	0.609652	0.0318103
		IRF1	3659	0.699515	0.031842
		C14orf156	81892	0.799996	0.0318696
		PSMB2	5690	0.816662	0.0320456
		KCTD1	284252	1.43316	0.0321098
		THOP1	7064	0.822156	0.0321203
		DRG1	4733	0.815944	0.0322502
		FCGR1B	2210	0.462977	0.0324828
		RABAC1	10567	0.714873	0.0324839
		WWC1	23286	0.493496	0.0325067
		TRAPPC6B	122553	1.22205	0.0325078
		TSPAN17	26262	0.846654	0.0325471
		RPS6KB2	6199	0.805393	0.0326039
		OAZ1	4946	0.774659	0.0326108
		PLEKHH2	130271	1.44983	0.0326829
		PPP1R13B	23368	1.43953	0.0327391
		SYK	6850	0.690372	0.0328643
		CHD6	84181	1.29163	0.0328956
		C10orf118	55088	1.39404	0.0329075
		GIYD2	79008	0.754061	0.0329197
		ZNF37A	7587	1.22331	0.0329639
		FCGR1A	2209	0.465919	0.0329718
		ZNF668	79759	0.71029	0.0330282
		SLFNL1	200172	1.61771	0.0330301
		C11orf83	790955	0.682525	0.0331106
		EIF3B	8662	0.812931	0.0331474
		MRPS30	10884	0.794749	0.033167
		TMEM126A	84233	0.742736	0.0331711
		PSMB9	5698	0.644673	0.0332069
		JAM2	58494	1.46348	0.0332204
		LRRC37A4	55073	1.40843	0.0332244
		SH3BGRL2	83699	1.50596	0.0332666
		SPA17	53340	0.716436	0.0332814
		S100A10	6281	0.58524	0.0333046
		MATN1	4146	2.77052	0.0333375
		ZNF543	125919	1.22434	0.0333615
		TIMM8A	1678	0.812761	0.0333945
		C10orf105	414152	1.87512	0.0334055
		ZNHIT1	10467	0.722333	0.0334899
		POLD4	57804	0.679868	0.0335294
		UQCRH	7388	0.784389	0.0336489
		IFI27L1	122509	0.73797	0.0336716
		AIFM1	9131	0.825256	0.0336781
		ZFP3	124961	1.26538	0.0336825
		NAALADL2	254827	1.59503	0.0337601
		ATP5E	514	0.70501	0.0337926
		CD180	4064	0.592082	0.0338537
		CCNB1	891	0.724487	0.0339321
		C7orf47	221908	0.74612	0.0339463
		POLR2I	5438	0.75439	0.0340046
		GSDMA	284110	0.380321	0.0340775
		PRPF31	26121	0.8423	0.0341153
		XRCC6	2547	0.831739	0.0341589
		GCAT	23464	0.694983	0.0341803
		C9orf70	84850	0.465436	0.0341815
		PFN1	5216	0.731384	0.0342377
		ACER1	125981	1.8739	0.0343286
		TIMM10	26519	0.722025	0.0343592
		BRMS1L	84312	1.23798	0.0343937
		PPM1D	8493	1.24983	0.0344016
		EIF4EBP2	1979	1.19769	0.0344127
		FHOD1	29109	0.732241	0.0345243
		CDKN2AIPNL	91368	0.843733	0.034529
		PRPF19	27339	0.855408	0.0345549
		ATP9B	374868	1.23273	0.0345747
		MTMR9	66036	1.24536	0.0346253
		PTPDC1	138639	1.26963	0.0346776
		C12orf62	84987	0.792607	0.0347627
		EGR1	1958	2.04019	0.0348306
		ZNF506	440515	1.22493	0.0350513
		CNNM2	54805	1.35141	0.0350813
		SRP19	6728	0.846762	0.0351217
		DFNA5	1687	0.692925	0.0351351
		POP7	10248	0.798912	0.0351435
		PRMT1	3276	0.801049	0.0352277
		ZP3	7784	0.586953	0.0352647
		TXLNB	167838	2.85936	0.0352669
		TXNDC17	84817	0.689154	0.0353683
		ZNF407	55628	1.20726	0.0353939
		PSMD8	5714	0.754698	0.0354548
		F7	2155	6.29139	0.0355298
		GLRX	2745	0.721085	0.0355394
		TUBB2C	10383	0.651501	0.0355556
		VAMP5	10791	0.64149	0.0355855
		C4orf41	60684	1.15042	0.0356421
		RNF149	284996	0.72688	0.0356986
		TUFM	7284	0.85387	0.0357254
		UBE2S	27338	0.673232	0.0357382
		PGP	283871	0.738265	0.0357591
		PHF2	5253	1.1815	0.0357738
		KIDINS220	57498	1.24477	0.0357886
		HTATIP2	10553	0.627159	0.035814
		RPS5	6193	0.723606	0.0358469
		CDK4	1019	2.75339	0.0358482
		CENPM	79019	0.724202	0.0359522
		HMGCL	3155	0.777347	0.0360322
		RPSA	3921	0.650234	0.0360668
		MAPK8IP3	23162	1.42267	0.0360713
		SIGLEC7	27036	0.624439	0.0361618
		MAGOH	4116	0.796437	0.0361663
		RPS13	6207	0.729701	0.0361872
		CMYA5	202333	2.2531	0.0362282
		C7orf30	115416	0.832719	0.0363461
		ADAP2	55803	0.63434	0.0363737
		FAM106A	80039	3.17118	0.0363836
		C19orf61	56006	0.752067	0.0365177
		BCL3	602	0.658959	0.0365356
		IGF2	3481	4.6307	0.0365879
		RAC2	5880	0.67747	0.0366159
		LRRK2	120892	1.53809	0.0366221
		SNRPC	6631	0.809548	0.0368098
		CRTAM	56253	0.478203	0.0368406
		ARHGEF9	23229	1.38155	0.0368747
		HCST	10870	0.600455	0.0370163
		CKS2	1164	0.646739	0.0370166
		IFNB1	3456	0.437927	0.0370172
		SUFU	51684	1.339	0.0370398
		LAPTM5	7805	0.585268	0.0370717
		ANKRD39	51239	0.759725	0.0370874
		NDUFA2	4695	0.73634	0.0371256
		IFIT1B	439996	2.00701	0.0372239
		SAAL1	113174	0.731528	0.0372623
		DTD1	92675	0.696644	0.0373541
		MMRN1	22915	2.21919	0.0373814
		PSMG4	389362	0.78382	0.0373941
		RPL35	11224	0.717871	0.0375313
		CXorf26	51260	0.808769	0.0375614
		TMEM30A	55754	1.27706	0.0376394
		DTYMK	1841	0.747402	0.0376619
		TREM2	54209	0.423029	0.0377633
		WDFY3	23001	1.2015	0.0377901
		LILRB4	11006	0.575018	0.037905
		ATP6V1F	9296	0.75254	0.0379789
		VBP1	7411	0.864837	0.038021
		EDARADD	128178	0.704755	0.0380969
		PUS1	80324	0.737354	0.0381089
		EDEM2	55741	0.770165	0.0381125
		PDXP	57026	0.798642	0.0381343
		DUSP16	80824	1.38088	0.0381393
		NCRNA00152	112597	0.506577	0.0381521
		WDR74	54663	0.746142	0.0381791
		DOK2	9046	0.633135	0.0382773
		TLCD1	116238	0.674209	0.0382837
		FCGR1C	100132417	0.531707	0.038316
		C9orf46	55848	0.686228	0.0383264
		MAGOHB	55110	0.759802	0.0383281
		B3GALNT1	8706	1.50989	0.0383297
		CYBASC3	220002	0.769268	0.0383387
		TRUB2	26995	0.831325	0.0384299
		SLC12A8	84561	0.398064	0.038443
		SIGLEC9	27180	0.546681	0.0384725
		ATP5L	10632	0.791414	0.0384803
		ZNF431	170959	1.23677	0.0386522
		MRPL47	57129	0.798465	0.0386765
		ZNF836	162962	1.22408	0.0386935
		CHIT1	1118	0.302646	0.0389242
		APOBEC3B	9582	0.686279	0.038947
		AKR7A2	8574	0.765164	0.0389577
		PDCD1	5133	0.461282	0.0390098
		HK3	3101	0.546313	0.0391199
		CCR1	1230	0.443865	0.0391876
		IKBKG	8517	0.81281	0.0391959
		NDUFAF1	51103	0.830713	0.03925
		STX1A	6804	0.502696	0.0392721
		NUDT1	4521	0.720717	0.0393444
		AMDHD2	51005	0.744612	0.0393813
		ZSCAN18	65982	1.3662	0.0393913
		GUCA2A	2980	4.3736	0.0393981
		NCOA1	8648	1.37189	0.0394592
		FH	2271	0.800594	0.0394879
		TRPM2	7226	0.610147	0.0395763
		MRPL41	64975	0.541934	0.0396084
		TAP2	6891	0.804369	0.0396824
		CAV1	857	0.587825	0.039726
		LRRC23	10233	0.769075	0.0397332
		ZNF844	284391	1.58018	0.039769
		ZNF532	55205	1.32074	0.0398099
		LOC440957	440957	0.738972	0.0398104
		TMUB1	83590	0.806908	0.0400268
		ATXN1L	342371	1.26848	0.0400974
		KRBA2	124751	1.32293	0.0401021
		RPSAP58	388524	0.651036	0.0402828
		THAP3	90326	0.798598	0.0403229
		ZFPL1	7542	0.779539	0.040368
		CLN6	54982	0.788785	0.0404221
		NAA20	51126	0.840922	0.0406844
		KPNA2	3838	0.730085	0.0408273
		APOO	79135	0.772841	0.0408545
		ATP5I	521	0.766548	0.0410433
		ZNF540	163255	1.5399	0.0410496
		C11orf31	280636	0.73936	0.0410583
		HINT3	135114	1.18071	0.0410877
		TMEM134	80194	0.747211	0.041108
		BTG2	7832	1.72057	0.0411502
		FAT4	79633	1.5438	0.0411726
		TBC1D22A	25771	0.792142	0.0413062
		MRPL51	51258	0.802392	0.0413679
		SNF8	11267	0.822597	0.0413814
		TMEM198	130612	1.58543	0.0414461
		PDZD11	51248	0.840788	0.0416211
		EIF2S2	8894	0.840615	0.0416439
		MYH10	4628	1.57551	0.0416521
		DPY30	84661	0.843482	0.0418691
		PPM1G	5496	0.861024	0.0418696
		ZXDC	79364	1.15418	0.0420193
		SON	6651	1.20182	0.0420363
		GPS1	2873	0.838118	0.0420451
		MDH2	4191	0.826452	0.0421011
		NUDT5	11164	0.75808	0.0421794
		TMEM14B	81853	0.829933	0.0422814
		OTUB1	55611	0.789675	0.0423019
		NOMO2	283820	1.34014	0.0423064
		CASP12	120329	1.87809	0.0424225
		ZNF263	10127	1.14634	0.0424779
		C11orf95	65998	1.86521	0.0424874
		MRPL54	116541	0.762273	0.0425386
		SRL	6345	5.09608	0.042653
		CBFA2T2	9139	1.20324	0.0427838
		ASH1L	55870	1.38803	0.0428522
		SLC35A1	10559	1.18942	0.0429088
		ZNF548	147694	1.1924	0.042949
		CLDN14	23562	0.44857	0.0429727
		OXA1L	5018	0.844033	0.0429739
		C7orf44	55744	0.805091	0.0431739
		APP	351	1.35757	0.0431763
		CTDSP2	10106	2.06428	0.0431774
		CD101	9398	1.62425	0.0432154
		RPL28	6158	0.671974	0.043285
		PSMB8	5696	0.753043	0.0433172
		FAHD2A	51011	0.795299	0.0433518
		UBXN1	51035	0.789506	0.0433989
		PSMB6	5694	0.776072	0.0434235
		PSMA4	5685	0.856067	0.0434321
		KSR1	8844	1.3946	0.0434612
		MRPL24	79590	0.770941	0.0434733
		RPUSD1	113000	0.811665	0.0434979
		GPR153	387509	2.09271	0.0436694
		TMEM69	51249	0.857631	0.0437421
		POLR2J	5439	0.745197	0.0437979
		APOE	348	0.482549	0.0438311
		ST6GALNAC3	256435	1.56864	0.0438674
		ZNF704	619279	1.50824	0.0439165
		C19orf70	125988	0.758022	0.0439574
		YIF1A	10897	0.715576	0.0440047
		NDUFB3	4709	0.817273	0.0440169
		CCL28	56477	1.62362	0.0440981
		MTA2	9219	0.864219	0.0442062
		IGSF6	10261	0.688844	0.0442171
		PQLC2	54896	0.733177	0.0442395
		TCEB2	6923	0.784491	0.044256
		EBP	10682	0.714278	0.0442802
		SGMS1	259230	1.23378	0.0443463
		ARHGDIA	396	0.793504	0.0443466
		COMMD4	54939	0.827378	0.0443638
		ZNF292	23036	1.28826	0.0445169
		MRPL10	124995	0.840865	0.0447812
		SOBP	55084	1.69787	0.0448055
		EIF3F	8665	0.764586	0.0448338
		BID	637	0.715352	0.044848
		ACTG1	71	0.820416	0.0448488
		MSR1	4481	0.66594	0.0449171
		REV3L	5980	1.45691	0.0450032
		PLA2G16	11145	0.628318	0.0450233
		PHLDA2	7262	0.513738	0.0450667
		GALM	130589	0.710406	0.0450839
		PTGFRN	5738	1.49286	0.0450966
		RNF152	220441	1.52693	0.0451369
		PTRH2	51651	0.813872	0.0451372
		ELN	2006	2.73097	0.0451574
		CHST3	9469	1.29655	0.0451817
		SP3	6670	1.19704	0.0451849
		DHH	50846	1.91999	0.0451966
		LOC541471	541471	0.648493	0.0452314
		PGLS	25796	0.752717	0.0452317
		PMS2L1	5379	0.850441	0.0453045
		TRIM65	201292	0.818774	0.0454419
		SMEK2	57223	1.19188	0.0455321
		TOMM22	56993	0.826061	0.0455381
		GNGT2	2793	0.628842	0.045647
		ZNF727	442319	2.89244	0.0456752
		TSC22D2	9819	1.20772	0.0458092
		RRAGB	10325	1.2584	0.0459181
		CAPN2	824	0.778648	0.0459887
		HAUS1	115106	0.839211	0.0460609
		CYCS	54205	0.830604	0.0461274
		ZNF323	64288	1.53401	0.0461728
		TMSL3	7117	0.69087	0.0461736
		APOC1	341	0.370625	0.0462458
		RHOU	58480	1.74863	0.0463955
		SRM	6723	0.734676	0.0464031
		PTPRJ	5795	0.766855	0.0464951
		RUVBL1	8607	0.836255	0.0465281
		VAV1	7409	0.620129	0.0466013
		FAM8A1	51439	1.24837	0.0466454
		SYCE1L	100130958	2.13446	0.0466562
		UTRN	7402	1.37844	0.0467873
		TICAM2	353376	0.682683	0.0468268
		TOR1AIP1	26092	1.2534	0.0468439
		LPCAT4	254531	0.704135	0.0468832
		PTK7	5754	1.58291	0.0468931
		RPS19BP1	91582	0.796699	0.046899
		SCLY	51540	0.819159	0.0469222
		CD53	963	0.682912	0.0469893
		SPR	6697	0.74645	0.0469918
		SIGLEC1	6614	0.623205	0.0470872
		KLF16	83855	0.74025	0.0470931
		RBMS3	27303	1.46473	0.047163
		RPS16	6217	0.724206	0.0471814
		CCDC9	26093	0.848446	0.0472335
		TMEM189	387521	0.774543	0.0472529
		ADH6	130	3.51644	0.0472869
		PSMG3	84262	0.763208	0.0473998
		UQCRHL	440567	0.786699	0.0475348
		MFSD2A	84879	0.347206	0.0476001
		ZNF79	7633	1.25714	0.0476515
		RIN1	9610	0.42078	0.0476856
		TREML1	340205	0.354481	0.047775
		C6orf94	153918	2.32014	0.0477795
		YIF1B	90522	0.646306	0.0477811
		ADCY3	109	1.26473	0.0478457
		ALG3	10195	0.744949	0.0478933
		ZNF430	80264	1.2269	0.0480393
		NLRC4	58484	0.713516	0.0480494
		ASCC2	84164	0.816695	0.0481539
		ELOVL1	64834	0.775888	0.048163
		TAP1	6890	0.707701	0.0482558
		CLCN5	1184	1.63809	0.0483188
		SCCPDH	51097	0.801849	0.0483714
		DPM2	8818	0.758471	0.0485421
		PTTG3P	26255	0.663145	0.048643
		NDUFB10	4716	0.754607	0.0487357
		ELF2	1998	1.20884	0.0487636
		ZNF317	57693	1.18862	0.0487684
		TMEM50A	23585	0.814685	0.0487936
		DNAJC27	51277	1.25584	0.0488097
		RIPK2	8767	0.758124	0.0488142
		NR2C2	7182	1.23185	0.0488504
		KCNJ5	3762	0.708571	0.0488903
		C11orf45	219833	0.608045	0.0489043
		RAB1B	81876	0.830116	0.0489275
		FAM158A	51016	0.762968	0.0489469
		RARS	5917	0.850519	0.0489704
		FANCC	2176	1.23681	0.0490704
		HELQ	113510	1.15532	0.0491485
		UCP2	7351	0.712958	0.0492004
		MLL3	58508	1.23554	0.0492325
		EFS	10278	1.42605	0.0493008
		WFIKKN2	124857	2.65979	0.0493016
		ACAN	176	2.55845	0.049354
		CCRL1	51554	4.40713	0.0493818
		MRPS28	28957	0.785903	0.0493888
		CYC1	1537	0.803218	0.0494078
		REEP5	7905	0.796459	0.0494599
		C1QC	714	0.620307	0.0494648
		RPUSD3	285367	0.841053	0.0495445
		COL6A4P2	646300	2.19849	0.0496054
		NCEH1	57552	0.572452	0.0496215
		MYPOP	339344	0.81326	0.0496515
		NR4A2	4929	1.9573	0.0496847
		ACTL8	81569	0.318532	0.0497601
		NCF1C	654817	0.534642	0.0497671
		NR1H2	7376	0.830819	0.0498085
		ATP5J	522	0.823984	0.0498101
		DOK6	220164	1.73619	0.049834
		RCOR1	23186	1.24936	0.0498658
		C10orf72	196740	1.42428	0.0498882
		MBTPS1	8720	1.28394	0.0499123
		GHR	2690	1.58745	0.049917
		POLA2	23649	0.797898	0.0499499
		STOX2	56977	1.87456	0.0500285
